# Supplementary material for: Syntheses of a series of BaCu2−xAgxSe2 (x = 0 – 1.0) selenides and evaluation of their thermoelectric properties
Source: Royal Society of Chemistry journal article supplement (doi:10.1039/d4nj00989d), 2024-01-01
Supplement: d4nj00989d1.pdf [file d4nj00989d1.pdf]

## Syntheses of a series of $\text{BaCu}_{2-x}\text{Ag}_x\text{Se}_2$ ( $x = 0 - 1.0$ ) selenides and evaluation of their thermoelectric properties

Swati, Sweta Yadav, Omair Shahid, and Jai Prakash\*

*Department of Chemistry, Indian Institute of Technology Hyderabad, Kandi, Sangareddy, Telangana 502285, India*

### Electronic Supplementary Information (ESI)

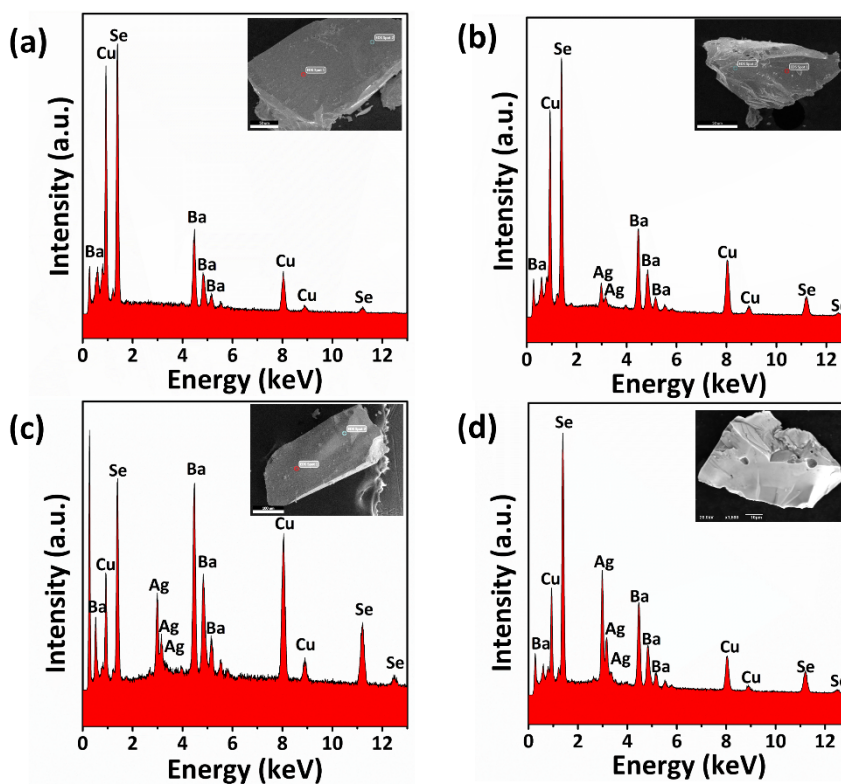

**Fig. S11:** The EDX spectra collected for (a) the  $x = 0$ , (b)  $x = 0.22$ , (c)  $x = 0.43$ , and (d)  $x = 0.8$  crystals used for single crystal X-ray diffraction studies.

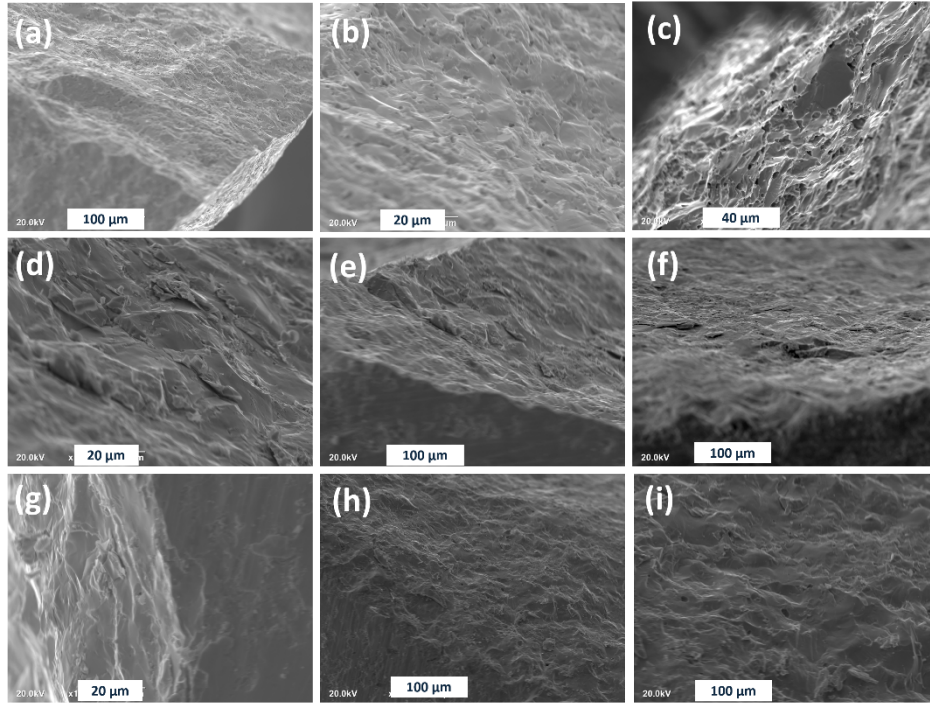

**Fig. SI2:** The SEM micrographs for the fractured surfaces of the pellets of (a-c)  $\text{BaCu}_2\text{Se}_2$ , (d-f)  $\text{BaCu}_{1.5}\text{Ag}_{0.5}\text{Se}_2$ , and (g-i)  $\text{BaCuAgSe}_2$  samples after thermal conductivity studies.

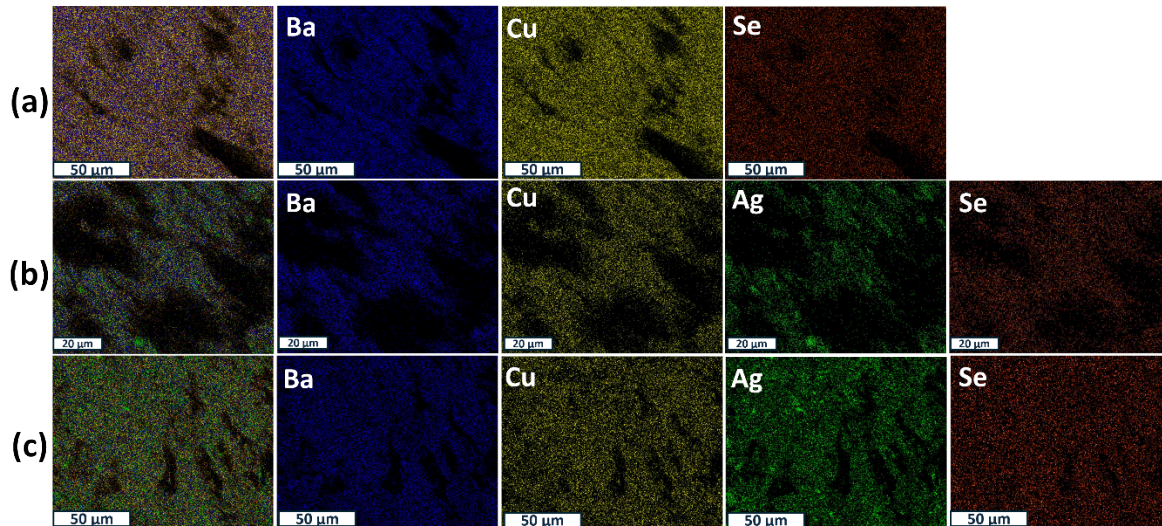

**Fig. SI3:** The EDX elemental mapping images for the pellets of (a)  $\text{BaCu}_2\text{Se}_2$ , (b)  $\text{BaCu}_{1.5}\text{Ag}_{0.5}\text{Se}_2$ , and (c)  $\text{BaCuAgSe}_2$  samples after thermal conductivity measurements.

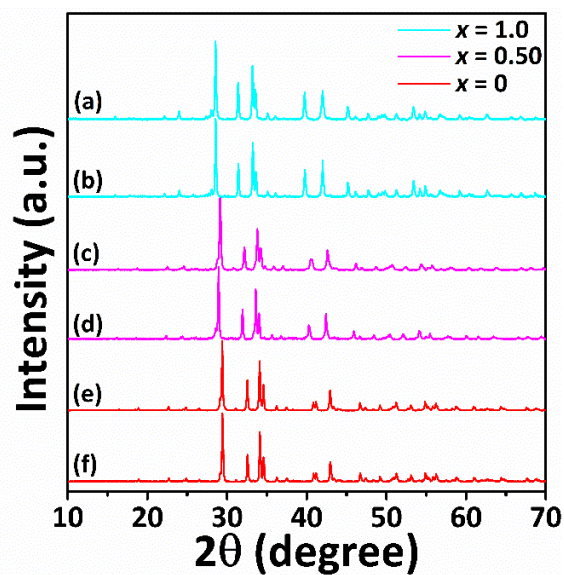

**Fig. SI4:** A comparison of the PXRD patterns for the polycrystalline  $\text{BaCu}_2\text{Se}_2$ ,  $\text{BaCu}_{0.5}\text{Ag}_{0.5}\text{Se}_2$ , and  $\text{BaCuAgSe}_2$  samples before and after thermal conductivity studies. The PXRD patterns marked with (a), (c), and (e) labels correspond to the patterns after the thermal conductivity studies, whereas (b), (d), and (f) are the patterns of as-synthesized samples shown for reference.

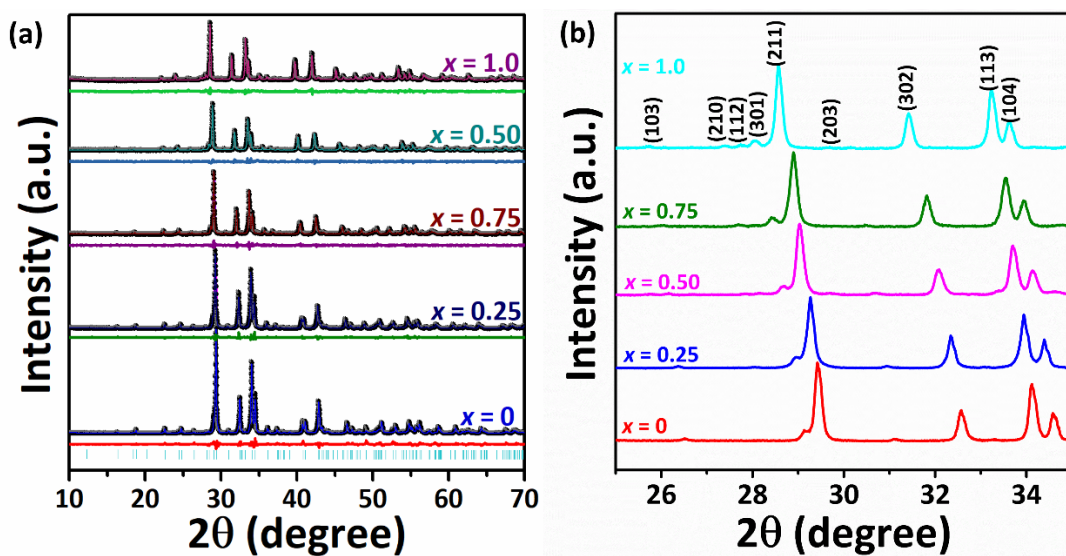

**Fig. SI5:** (a) The Le-Bail refinement plots of the PXRD patterns for the polycrystalline  $\text{BaCu}_{2-x}\text{Ag}_x\text{Se}_2$  ( $x = 0, 0.25, 0.50, 0.75, \text{ and } 1.0$ ) samples at RT and (b) the PXRD patterns for the  $\text{BaCu}_{2-x}\text{Ag}_x\text{Se}_2$  samples from  $25^\circ$  to  $35^\circ$  showing the peak shift with increase in the Ag concentration.

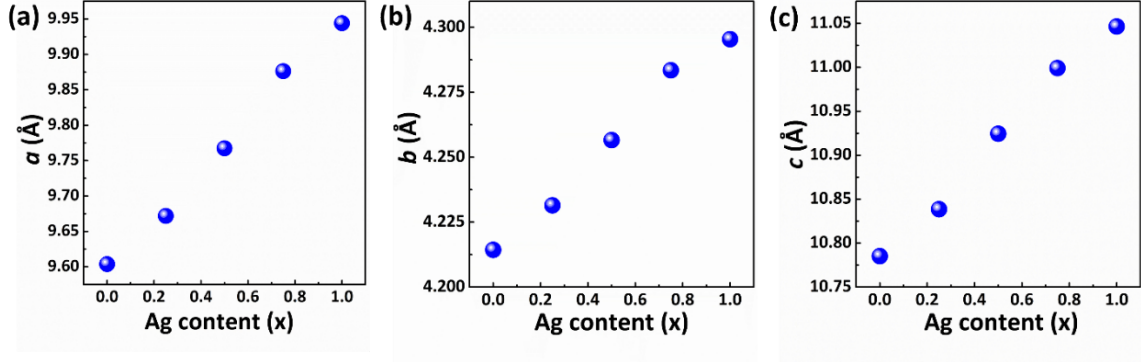

**Fig. S16:** The refined unit cell parameters ( $\text{\AA}$ ) of the polycrystalline  $\text{BaCu}_{2-x}\text{Ag}_x\text{Se}_2$  ( $x = 0, 0.25, 0.51, 0.75, 1.0$ ) samples as a function of Ag content ( $x$ ).

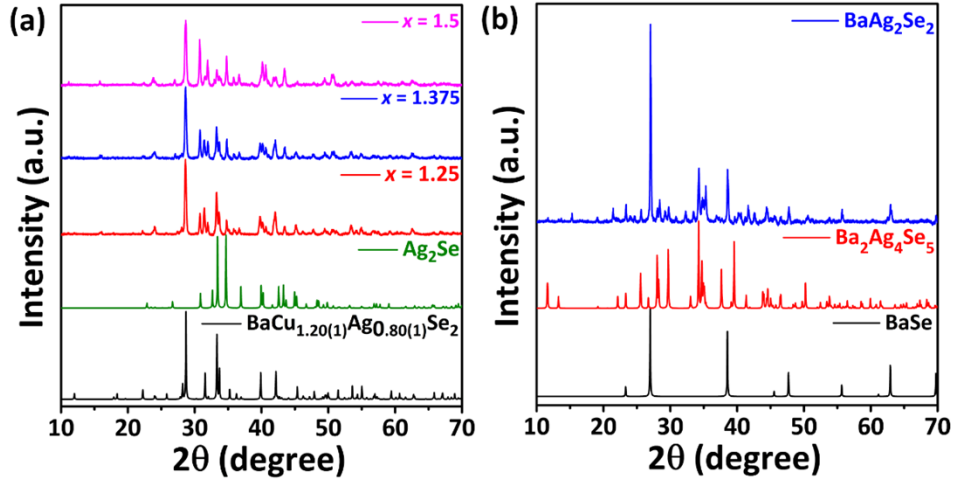

**Fig. S17:** (a) The experimental PXRD patterns of the products of the reactions with the loaded compositions of  $\text{BaCu}_{2-x}\text{Ag}_x\text{Se}_2$  ( $x = 1.25, 1.375, \text{ and } 1.5$ ) and (b)  $\text{BaAg}_2\text{Se}_2$ . These figures also contain theoretical PXRD patterns of the  $\text{BaCu}_{1.20(1)}\text{Ag}_{0.80(1)}\text{Se}_2$ ,  $\text{Ag}_2\text{Se}$ ,<sup>1</sup>  $\text{BaSe}$ ,<sup>2</sup> and  $\text{Ba}_2\text{Ag}_4\text{Se}_5$ .<sup>3</sup>

**Table S11:** The atomic displacement parameters ( $\text{\AA}^2$ ) for the  $\text{BaCu}_{2-x}\text{Ag}_x\text{Se}_2$  ( $x = 0, 0.22, 0.43, 0.51, \text{ and } 0.80$ ) structures.

| Atom                       | $U^{11}$    | $U^{22}$    | $U^{33}$    | $U^{12}$ | $U^{13}$    | $U^{23}$ |
|----------------------------|-------------|-------------|-------------|----------|-------------|----------|
| $\text{BaCu}_2\text{Se}_2$ |             |             |             |          |             |          |
| Ba1                        | 0.01194(18) | 0.00785(17) | 0.00872(18) | 0.000    | 0.00063(12) | 0.000    |
| Cu1                        | 0.0199(4)   | 0.0139(4)   | 0.0174(4)   | 0.000    | 0.0047(3)   | 0.000    |
| Cu2                        | 0.0144(4)   | 0.0202(4)   | 0.0158(4)   | 0.000    | -0.0008(3)  | 0.000    |
| Se1                        | 0.0089(3)   | 0.0073(3)   | 0.0078(3)   | 0.000    | 0.0003(2)   | 0.000    |

|                                                       |             |             |             |       |              |       |
|-------------------------------------------------------|-------------|-------------|-------------|-------|--------------|-------|
| Se2                                                   | 0.0105(3)   | 0.0077(3)   | 0.0078(3)   | 0.000 | 0.0001(2)    | 0.000 |
| $\text{BaCu}_{1.78(1)}\text{Ag}_{0.22(1)}\text{Se}_2$ |             |             |             |       |              |       |
| Ba1                                                   | 0.0139(2)   | 0.0099(2)   | 0.0103(2)   | 0.000 | 0.00043(15)  | 0.000 |
| Cu1/Ag1                                               | 0.0211(5)   | 0.0167(5)   | 0.0201(6)   | 0.000 | 0.0055(4)    | 0.000 |
| Cu2/Ag2                                               | 0.0163(4)   | 0.0245(5)   | 0.0173(6)   | 0.000 | -0.0013(3)   | 0.000 |
| Se1                                                   | 0.0140(3)   | 0.0120(3)   | 0.0096(4)   | 0.000 | 0.0007(3)    | 0.000 |
| Se2                                                   | 0.0129(3)   | 0.0126(3)   | 0.0138(4)   | 0.000 | 0.0012(3)    | 0.000 |
| $\text{BaCu}_{1.57(1)}\text{Ag}_{0.43(1)}\text{Se}_2$ |             |             |             |       |              |       |
| Ba1                                                   | 0.0174(2)   | 0.01122(19) | 0.01131(19) | 0.000 | 0.00063(12)  | 0.000 |
| Cu1/Ag1                                               | 0.0247(4)   | 0.0184(4)   | 0.0236(4)   | 0.000 | 0.0056(3)    | 0.000 |
| Cu2/Ag2                                               | 0.0192(4)   | 0.0256(4)   | 0.0185(4)   | 0.000 | -0.0015(3)   | 0.000 |
| Se1                                                   | 0.0201(3)   | 0.0151(3)   | 0.0108(3)   | 0.000 | 0.0014(2)    | 0.000 |
| Se2                                                   | 0.0162(3)   | 0.0139(3)   | 0.0175(3)   | 0.000 | 0.0023(2)    | 0.000 |
| $\text{BaCu}_{1.49(1)}\text{Ag}_{0.51(1)}\text{Se}_2$ |             |             |             |       |              |       |
| Ba1                                                   | 0.01623(13) | 0.00841(12) | 0.01028(13) | 0.000 | 0.00054(7)   | 0.000 |
| Cu1/Ag1                                               | 0.0235(3)   | 0.0164(3)   | 0.0232(3)   | 0.000 | 0.00573(19)  | 0.000 |
| Cu2/Ag2                                               | 0.0179(2)   | 0.0221(3)   | 0.0173(3)   | 0.000 | -0.00128(16) | 0.000 |
| Se1                                                   | 0.0193(2)   | 0.01296(19) | 0.0097(2)   | 0.000 | 0.00131(14)  | 0.000 |
| Se2                                                   | 0.01538(19) | 0.01168(19) | 0.0178(2)   | 0.000 | 0.00276(14)  | 0.000 |
| $\text{BaCu}_{1.20(1)}\text{Ag}_{0.80(1)}\text{Se}_2$ |             |             |             |       |              |       |
| Ba1                                                   | 0.01624(17) | 0.01166(17) | 0.01071(17) | 0.000 | 0.00025(12)  | 0.000 |
| Cu1/Ag1                                               | 0.0237(4)   | 0.0206(4)   | 0.0239(4)   | 0.000 | 0.0056(3)    | 0.000 |
| Cu2/Ag2                                               | 0.0185(3)   | 0.0248(3)   | 0.0188(3)   | 0.000 | -0.0017(2)   | 0.000 |
| Se1                                                   | 0.0204(3)   | 0.0182(3)   | 0.0108(3)   | 0.000 | 0.0016(2)    | 0.000 |
| Se2                                                   | 0.0170(3)   | 0.0159(3)   | 0.0196(3)   | 0.000 | 0.0037(2)    | 0.000 |

## References

- 1 J. Yu and H. Yun, *Acta Cryst. E*, 2011, **67**, i45–i45.
- 2 T. A. Grzybowski and A. L. Ruoff, *Phys. Rev. B*, 1983, **27**, 6502–6503.
- 3 A. Assoud, J. Xu, and H. Kleinke, *Inorg. Chem.*, 2007, **46**, 9906–9911.
